# Supplementary material for: Role of IL-4 in bone marrow driven dysregulated angiogenesis and age-related macular degeneration
Source: eLife. 2020 May 5;9:e54257. doi: 10.7554/eLife.54257 (PMC7200155; doi:10.7554/eLife.54257)
Supplement: Figure 1—source data 1. [file elife-54257-fig1-data1.xlsx]

## Sheet: Fig1a
	Figure 1a
	Raw Data									Statistics			SS: sum of squares				*P<0.05
													DF: degrees of freedom				**P<0.01
	Il4 mRNA									Il4 mRNA			MS: mean squares				***P<0.005
	Category	0h	12h	1d	3d	7d
	Il4 mRNA (copy/GAPDH)	4.38e-07	2.68e-07	4.14e-07	5.96e-07	7.7e-07				ANOVA table
		1.48e-06	3.82e-06	2.68e-07	4.65e-06	8.47e-07					SS	DF	MS	F-value	P-value
		5.59e-07	1.52e-06	5.94e-07	4.3e-06	1.66e-07				Factors	3.93137e-11	4	9.82843e-12	3.68151	0.0103025	*
		2.37e-07	2.77e-07	7.69e-07	6.24e-07	7.76e-07				Error	1.38823e-10	52	2.66968e-12
		8.08e-07	2.14e-06	1.69e-08	6.46e-07	3.18e-08				Total	1.78137e-10	56
		1.89e-06	6.03e-07	8.03e-07	1.59e-06	3.93e-06
		6.95e-07	3.4e-07	1.3e-06	3.78e-06	8.54e-07						P-value						Linear mixed-effects regression analysis
		1.35e-06	3.96e-07	1.23e-06	9e-06	7.05e-09				Category 1	Category 2	Bonferroni	Tukey					Category 1	Category 2	DF	Contrast	SE	95%CI		chi2	P>chi2
		1.12e-08	9.82e-07	1.32e-06		6.97e-06				0h	3d	0.0421796	0.0322489	*				0h	3d	1	2.27e-06	7.25e-07	8.51e-07	3.69e-06	9.82	0.0017	***
		8.76e-07	6e-07	9.48e-07		5.67e-06				12h	3d	0.0266952	0.0210892	*
		1.29e-06	2.68e-07	7.87e-07		1.44e-06				1d	3d	0.0247361	0.0196383	*
			9e-08	2.83e-07
			2.84e-07	1.83e-06						Fisher's PLSD
			5.04e-07							Category 1	Category 2	P-value
	N	11	14	13	8	11				0h	3d	0.00421796	***
	Mean	8.75836e-07	8.63714e-07	8.12531e-07	3.14825e-06	1.95108e-06				12h	3d	0.00266952	***
	SD	5.72276e-07	1.02138e-06	5.11712e-07	2.92279e-06	2.42992e-06				1d	3d	0.00247361	***
	Median	8.08e-07	4.5e-07	7.87e-07	2.685e-06	8.47e-07
	SEM	1.72548e-07	2.72976e-07	1.41923e-07	1.03336e-06	7.32648e-07
	95%CI	4.91376e-07	2.73986e-07	5.03306e-07	7.04733e-07	3.18636e-07
		1.2603e-06	1.45344e-06	1.12176e-06	5.59177e-06	3.58352e-06
	Il4ra mRNA									Il4ra mRNA
	Category	0h	12h	1d	3d	7d
	Il4ra mRNA (copy/GAPDH)	8.8e-05	0.000112	0.00034	0.000291	0.000415				ANOVA table
		0.000101	0.000319	0.000327	0.000346	0.000458					SS	DF	MS	F-value	P-value
		0.000256	0.000444	0.000374	0.000438	0.000518				Factors	2.40472e-05	4	6.01181e-06	2.53118	0.0537197
		8.53e-05	0.000477	0.000411	0.0075	0.000365				Error	0.000104505	44	2.3751e-06
		9.55e-05	0.000379	0.000163	0.000802	0.000385				Total	0.000128552	48
		0.00045	0.000417	0.000479	0.000375	0.000549
		0.000743	0.000968	0.000424	0.0006	0.000516				Fisher's PLSD								Linear mixed-effects regression analysis
		0.00068	0.000564	0.000476	0.00951	0.000488				Category 1	Category 2	P-value						Category 1	Category 2	DF	Contrast	SE	95%CI		chi2	P>chi2
		0.000531	0.000511	0.000457	0.00106	0.000463				0h	3d	0.0137912	*					0h	3d	1	0.0018166	0.000671	0.0005014	0.0031317	7.33	0.0068	**
			0.000455	0.000446	0.00061	0.000634				12h	3d	0.0183326	*
	N	9	10	10	10	10				1d	3d	0.0140233	*
	Mean	0.000336644	0.0004646	0.0003897	0.0021532	0.0004791				7d	3d	0.0192941	*
	SD	0.000268985	0.000216342	9.59121e-05	0.00338892	8.0637e-05
	Median	0.000256	0.0004495	0.0004175	0.000605	0.0004755
	SEM	8.96616e-05	6.84133e-05	3.03301e-05	0.00107167	2.54997e-05
	95%CI	0.000129885	0.000309838	0.000321089	-0.000271089	0.000421416
		0.000543404	0.000619362	0.000458311	0.00457749	0.000536784
	Ccr2 mRNA									Ccr2 mRNA
	Category	0h	12h	1d	3d	7d
	Ccr2 mRNA (copy/GAPDH)	0.000655	0.00208	0.00102	0.00234	0.00136				ANOVA table
		0.00115	0.00192	0.00227	0.00263	0.00333					SS	DF	MS	F-value	P-value
		0.00074	0.00213	0.0011	0.00343	0.00261				Factors	0.000228068	4	5.70171e-05	2.91431	0.0315859	*
		0.00121	0.00368	0.0217	0.00887	0.00061				Error	0.000880402	45	1.95645e-05
		0.00031	0.00267	0.00182	0.00816	0.000494				Total	0.00110847	49
		0.00116	0.00279	0.00279	0.0185	0.00777
		0.00182	0.00329	0.0044	0.00468	0.000422				Fisher's LSD								Linear mixed-effects regression analysis
		0.00114	0.00159	0.00365	0.0032	0.000801				Category 1	Category 2	P-value						Category 1	Category 2	DF	Contrast	SE	95%CI		chi2	P>chi2
		0.00069	0.00309	0.0214	0.00132	0.000997				0h	1d	0.00769138	**					0h	1d	1	0.00552	0.0018766	0.0018419	0.0091981	8.65	0.0033	***
		0.000575	0.00646	0.0045	0.00441	0.00174				0h	3d	0.0190991	*					0h	3d	1	0.004809	0.0018766	0.0011309	0.0084871	6.57	0.0104	*
	N	10	10	10	10	10				1d	7d	0.0294	*
	Mean	0.000945	0.00297	0.006465	0.005754	0.0020134
	SD	0.000433769	0.00139156	0.00804377	0.00509812	0.00223714
	Median	0.00094	0.00273	0.00322	0.00392	0.0011785
	SEM	0.00013717	0.000440051	0.00254366	0.00161217	0.000707446
	95%CI	0.0006347	0.00197454	0.000710834	0.00210702	0.000413047
		0.0012553	0.00396546	0.0122192	0.00940098	0.00361375
	Itgam mRNA									Itgam mRNA
	Category	0h	12h	1d	3d	7d
	Itgam mRNA (copy/GAPDH)	0.000406	0.000353	0.000367	0.000537	0.000359				ANOVA table
		0.000133	0.000472	0.000294	0.000264	0.00039					SS	DF	MS	F-value	P-value
		0.000327	0.000345	0.000559	0.000438	0.00055				Factor	1.20427e-07	4	3.01068e-08	2.36496	0.0894966
		0.000215	0.000226	0.000336	0.000569	0.000321				Errors	2.41877e-07	19	1.27304e-08
		0.000149	0.000485	0.000517		0.000424				Total	3.62304e-07	23
	N	5	5	5	4	5
	Mean	0.000246	0.0003762	0.0004146	0.000452	0.0004088				Fisher's LSD								Linear mixed-effects regression analysis
	SD	0.00011758	0.000106168	0.000116539	0.000137179	8.76225e-05				Category 1	Category 2	P-value						Category 1	Category 2	DF	Contrast	SE	95%CI		chi2	P>chi2
	Median	0.000215	0.000353	0.000367	0.0004875	0.00039				0h	1d	0.0289618	*					0h	12h	1	0.0001302	6.35e-05	5.76e-06	0.0002546	4.21	0.0403	*
	SEM	5.25833e-05	4.74799e-05	5.21178e-05	6.85894e-05	3.9186e-05				0h	3d	0.0135396	*					0h	1d	1	0.0001686	6.35e-05	4.42e-05	0.000293	7.05	0.0079	**
	95%CI	0.000100005	0.000244375	0.000269898	0.000233718	0.000300002				0h	7d	0.03423	*					0h	3d	1	0.000206	6.73e-05	7.4e-05	0.000338	9.36	0.0022	***
		0.000391995	0.000508025	0.000559302	0.000670282	0.000517598												0h	7d	1	0.0001628	6.35e-05	3.84e-05	0.0002872	6.57	0.0103	*
