# Supplementary material for: Role of IL-4 in bone marrow driven dysregulated angiogenesis and age-related macular degeneration
Source: eLife. 2020 May 5;9:e54257. doi: 10.7554/eLife.54257 (PMC7200155; doi:10.7554/eLife.54257)
Supplement: Figure 2—source data 1. [file elife-54257-fig2-data1.xlsx]

## Sheet: Fig2a
	Figure 2a
	Raw Data															Statistics
	ID	Category		CNV Area (μm2)				Category	PBS	rIL-4		rIL-13				ANOVA table
				#1	#2	#3				0.1 ng/100 uL	1 ng/100 uL	0.1 ng/100 uL	1 ng/100 uL					SS	DF	MS	F-value	P-value
	1	PBS		1528.51	1404.62	1122.96		N(spot)	51	21	45	58	30			Within-Subjects	Within-Subjects Factors	1.36296e+07	2	6.81478e+06	170.33	1.50086e-36	***
	2			2008.13	1577.46	1156.92		N(eye)	17	7	15	20	10				Category * Within-Subjects Factors	350172	8	43771.5	1.09403	0.371722
	3			1601.51	1509.53	1399.7		Mean	1583.12	1799.41	2008.76	1590.85	1553.04				Error	5.04118e+06	126	40009.3
	4			1889.24	1108.97	917.147		SD	388.873	454.234	377.609	414.133	428.628			Between-Subjects	Category	6.51944e+06	4	1.62986e+06	7.79301	3.61921e-05	***
	5			1698.56	955.112	847.212		Median	1555	1993.75	1978.8	1616.4	1508.4				Error	1.31761e+07	63	209144
	6			1273.82	1103.04	1066.01		SEM	54.4531	99.122	56.2907	54.8533	78.2563			Total		3.94133e+07	203
	7			1606.51	1519.59	1065.01		95%CI	1473.75	1592.65	1895.32	1480.97	1392.99
	8			2208.95	1809.32	1622.49			1692.5	2006.18	2122.21	1700.74	1713.09			SS: sum of squares			**P<0.001
	9			2351	2083	1729										DF: degrees of freedom			***P<0.0005
	10			1962	1725	1629										MS: mean squares
	11			1911	1604	1353
	12			2556	2456	1612
	13			2195	1829	1418												P-value
	14			1530	1520	1408										Category 1	Category 2	Bonferroni	Tukey
	15			1769	1542	1350										PBS	rIL-4 (1 ng/100 uL)	0.000249688	0.000225103	***
	16			1448	1270	1236										rIL-4 (1 ng/100 uL)	rIL-13 (0.1 ng/100 uL)	0.000222788	0.000201396	***
	17			1960	1738	1555										rIL-4 (1 ng/100 uL)	rIL-13 (1 ng/100 uL)	0.000777079	0.000681648	**
	18	rIL-4	0.1 ng/100 uL	2148.32	2103.96	1372.72
	19			2490.08	2053.77	2031
	20			2129.22	1336.76	1323.65
	21			1855.87	1620.89	1240.85
	22			2076.38	1993.75	971.097
	23			2382.18	1560.95	1285.2
	24			2335.43	2228.73	1246.84
	25		1 ng/100 uL	2394.09	2214.34	1813.91
	26			2521.26	2305.37	2270.69
	27			2386.9	2345.02	1759.96
	28			2922.88	2424.15	1415.88
	29			2870.13	1955.38	1795.93
	30			2474.5	2108.84	1397.9
	31			2071.67	1909.99	1793.53
	32			2251.2	1688.4	1650.86
	33			1701.6	1669.2	1542
	34			2320.8	1902	1882.8
	35			2120.4	1611.6	1450.8
	36			2092.8	1822.8	1515.6
	37			2270.4	2146.8	1978.8
	38			1915.2	1764	1280.4
	39			2348.4	2304	2011.2
	40	rIL-13	0.1 ng/100 uL	1777.5	1666.8	1351.8
	41			1661.4	1423.8	1138.5
	42			1616.4	1453.5	1073.7
	43			1917.9	1655.1	1637.1
	44			2411.1	1419.3	930.6
	45			1680.3	1480.5	1307.7
	46			1787.4	1727.1	1314
	47			2030.4	1650.6	1501.2
	48			1899	1415.7	1394.1
	49			1921.5	1791	1306.8
	50			2216.4	1910.4	1339.2
	51			2354.4	1647.6	1509.6
	52			2210.4	1947.6	1026
	53			2294.4	1356	1023.6
	54			2126.4	1474.8	1332
	55			1071.6	750	626.4
	56			1768.8	1447.2	1267.2
	57			1983.6	1152	1078.8
	58			2149.2	2358	1915.2
	59		1 ng/100 uL	1721.7	1494.9	1070.1
	60			2471.4	1751.4	1436.4
	61			2551.5	1850.4	1621.8
	62			2043.9	1251	1119.6
	63			1634.4	1585.8	947.7
	64			1444.5	1367.1	1005.3
	65			1926.9	1713.6	1026.9
	66			1200.6	1181.7	973.8
	67			2157.3	1800	1521.9
	68			2037.6	1489.5	1192.5

## Sheet: Fig2b
	Figure 2b
	Raw Data												Statistics
	ID	Category	CNV Area (μm2)				Category	Control IgG	anti-IL-4Ab	anti-IL-13 Ab			ANOVA table
			#1	#2	#3		N(spot)	60	21	24					SS	DF	MS	F-value	P-value
	1	Control IgG	1905.63	1497.37	1188.41		N(eye)	20	7	8			Within-Subjects	Within-Subjects Factors	6.92846e+06	2	3.46423e+06	86.1221	7.08275e-19	***
	2		1766.05	1284.45	932.673		Mean	1494.87	919.429	1444.41				Category * Within-Subjects Factors	336338	4	84084.5	2.09037	0.0923419
	3		2002.11	1071.53	1069.22		SD	359.411	456.451	507.787				Error	2.57438e+06	64	40224.6
	4		1507.45	1261.11	669.239		Median	1573.6	719.349	1401.03			Between-Subjects	Category	5.33146e+06	2	2.66573e+06	11.0694	0.000221955	***
	5		860.768	858.541	824.022		SEM	46.3997	99.6057	103.652				Error	7.70624e+06	32	240820
	6		1714.57	1668.91	1483.24		95%CI	1402.03	711.655	1229.99			Total		2.30503e+07	104
	7		1881.6	1670.02	862.996			1587.72	1127.2	1658.82
	8		1829.26	1730.45	1100.18								SS: sum of squares			*P<0.005
	9		1859.08	1688.95	1603.21								DF: degrees of freedom			***P<0.0005
	10		1859.08	1693.7	1375.23								MS: mean squares
	11		1693.7	1688.95	1603.21
	12		1525.08	1375.23	1211.2
	13		1861.93	1543.99	979.193										P-value
	14		2000.25	1980.92	1919.93								Category 1	Category 2	Bonferroni	Tukey
	15		1537.16	1149.78	923.466								Control IgG	anti-IL-4Ab	0.000176757	0.000164593	***
	16		1913.6	1726.38	1513.71								anti-IL-4Ab	anti-IL-13 Ab	0.00336109	0.0029973	*
	17		1753.89	1181.63	1105.43
	18		1870.82	1714.58	1646.77
	19		1798.25	1519.4	1138.41
	20		1963.15	1722.05	1411.36
	22	anti-IL-4Ab	1619.91	1390.81	736.052
	23		1200.4	1180.64	552.317
	24		1693.7	700.418	632.492
	25		703.759	620.243	459.893
	26		1876.9	962.101	581.269
	27		1496.31	719.349	514.457
	28		741.619	609.108	316.246
	29	anti-IL-13 Ab	1642.1	1024.21	936.203
	30		2494.98	2171.99	1184.3
	31		1632.74	804.199	743.345
	32		2584.86	1693.59	1662.7
	33		1610.27	1068.21	730.238
	34		1771.3	1646.78	1364.05
	35		1831.21	1428.65	1209.57
	36		1373.41	1126.25	930.586

## Sheet: Fig2c
	Figure 2c
	Raw Data											Statistics
	ID	Category	CNV Area (μm2)				Mouse	WT	Il4-/-			ANOVA table
			#1	#2	#3		N(spot)	27	24					SS	DF	MS	F-value	P-value
	1	WT	2307.13	1768.03	1425.13		N(eye)	9	8			Within-Subjects	Within-Subjects Factors	3.4626e+06	2	1.7313e+06	41.6247	2.21962e-09	***
	2		1648.52	1515.25	1282.38		Mean	1553.86	895.197				Category * Within-Subjects Factors	70973.5	2	35486.7	0.853188	0.436134
	3		2300.24	1099.39	1066.9		SD	376.842	341.686				Error	1.24779e+06	30	41593.1
	4		1559.97	1349.93	1207.97		Median	1522.14	816.425			Between-Subjects	Category * Within-Subjects Factors	5.51228e+06	1	5.51228e+06	53.9287	2.43091e-06	***
	5		2003.66	1605.33	1281.27		SEM	72.5233	69.7463				Error	1.53321e+06	15	102214
	6		2380.11	1586.64	1239.34		95%CI	1404.79	750.916			Total		1.18898e+07	50
	7		1522.14	1434.25	1027.52			1702.93	1039.48
	8		1673.02	1630.28	1183.49							SS: sum of squares			***P<0.0005
	9		2008.09	1603.99	1244.24							DF: degrees of freedom
	11	Il4-/-	1751.1	952.634	655.049							MS: mean squares
	12		1568.87	622.341	593.638
	13		828.18	609.213	564.713
	14		1222.65	889.122	788.328									P-value
	15		986.9	828.824	763.408							Category 1	Category 2	Bonferroni	Tukey
	16		1201.52	804.67	496.404							WT	Il4-/-	2.43091e-06	3.67012e-06	***
	17		790.207	527.11	461.694
	18		1311.75	1284.51	981.906

## Sheet: Fig2d
	Figure 2d
	Raw Data													Statistics
	ID	Category	CNV Area (μm2)				Mouse	WT	Il4ra+/-	Il4ra-/-	IL13ra1-/-			ANOVA table
			#1	#2	#3		N(spot)	51	27	21	30					SS	DF	MS	F-value	P-value
	1	WT	2551	2465	1919		N(eye)	17	9	7	10			Within-Subjects	Within-Subjects Factors	1.0895e+07	2	5.4475e+06	64.3966	3.06036e-17	***
	2		1664	1234	1203		Mean	1485.84	1106.93	1037.29	1309.86				Category * Within-Subjects Factors	306951	6	51158.4	0.60476	0.725726
	3		2562	1324	1122		SD	509.963	392.577	371.802	478.1				Error	6.59825e+06	78	84593
	4		1210	1136	1110		Median	1406	1121	1012	1348			Between-Subjects	Category	4.21315e+06	3	1.40438e+06	7.88723	0.000312577	***
	5		1406	1399	1093		SEM	71.4091	75.5514	81.1339	87.2886				Error	6.94425e+06	39	178058
	6		1368	1147	1066		95%CI	1342.41	951.628	868.043	1131.33			Total		3.06168e+07	128
	7		1752	1440	1181			1629.27	1262.22	1206.53	1488.38
	8		2006.43	1764.83	1438									SS: sum of squares			*P<0.005
	9		2647.24	1275.72	810.945									DF: degrees of freedom			***P<0.0005
	10		1815.9	1266.33	665.501									MS: mean squares
	11		1520.45	1327.51	911.843
	12		2673	2265.39	424.257
	13		1755.26	1426.53	1308.19											P-value
	14		1693.81	1676.1	1603.64									Category 1	Category 2	Bonferroni	Tukey
	15		1556.86	1416.6	805.578									WT	Il4ra+/-	0.00321826	0.00279548	*
	16		2125.84	1253.45	742.785									WT	Il4ra-/-	0.00121764	0.00108302	*
	17		1514.6	1408.6	1324.83
	18	Il4ra+/-	1609	1485	1023
	19		1390	986	937
	20		1257	1170	1313
	21		1906	1407	479
	22		1480	945	900
	23		1521	1218	829
	24		1592	949	770
	25		1230	392	326
	26		1121	1102	550
	27	Il4ra-/-	1268	1260	825
	28		1785	1012	486
	29		1087	634	606
	30		1273	1238	1065
	31		1510	718	678
	32		1806	1277	834
	33		843	800	778
	34	IL13ra1-/-	2266.73	1368.3	645.375
	35		2061.17	1327.69	1125.45
	36		1556.95	1537.14	1494.47
	37		2046.95	1245.67	644.033
	38		1793.36	1169.99	648.595
	39		1033.94	843.146	527.302
	40		1746.94	1380.15	720.78
	41		1760.89	1453.37	901.109
	42		1709.64	1381.72	687.237
	43		1922.97	1245.89	1048.7
