# Supplementary material for: Role of IL-4 in bone marrow driven dysregulated angiogenesis and age-related macular degeneration
Source: eLife. 2020 May 5;9:e54257. doi: 10.7554/eLife.54257 (PMC7200155; doi:10.7554/eLife.54257)
Supplement: Figure 3—figure supplement 1—source data 1. [file elife-54257-fig3-figsupp1-data1.xlsx]

## Sheet: Fig3-sup1
	Figure 3-figure supplement 1
	Raw Data
		Kdr mRNA
	Category	IgG Control	anti IL-4RαAb	IgG Control	anti IL-4RαAb	IgG Control	anti IL-4RαAb
		IL-4 0ng/ml		IL-4 10ng/ml		IL-4 100ng/ml
	Kdr mRNA (copy/GAPDH)	0.00413	0.00454	0.00115	0.00415	0.00134	0.00303
		0.00367	0.00411	0.00217	0.00557	0.00146	0.00299
		0.00558	0.00429	0.00159	0.0042	0.00147	0.0027
		0.00521	0.00401	0.00205	0.00597	0.00133	0.00246
		0.00371	0.00406	0.00197	0.00498	0.00173	0.00317
	N	5	5	5	5	5	5
	Mean	0.00446	0.004202	0.001786	0.004974	0.001466	0.00287
	SD	0.0008821	0.000216495	0.000416509	0.000810142	0.000161338	0.00028592
	Median	0.00413	0.00411	0.00197	0.00498	0.00146	0.00299
	SEM	0.000394487	9.68194e-05	0.000186269	0.000362307	7.21526e-05	0.000127867
	95%CI	0.00336473	0.00393319	0.00126884	0.00396808	0.00126567	0.00251498
		0.00555527	0.00447081	0.00230316	0.00597992	0.00166633	0.00322502
		Flt4 mRNA
	Category	IgG Control	anti IL-4RαAb	IgG Control	anti IL-4RαAb	IgG Control	anti IL-4RαAb
		IL-4 0ng/ml		IL-4 10ng/ml		IL-4 100ng/ml
	Flt4 mRNA (copy/GAPDH)	6.35e-05	6.97e-05	3.48e-05	6.08e-05	4.29e-05	7.41e-05
		6.71e-05	9.86e-05	7.33e-05	8.77e-05	4.12e-05	5.8e-05
		6.67e-05	8.63e-05	5.99e-05	5.87e-05	6.49e-05	7.96e-05
		9.95e-05	9.43e-05	4.94e-05	8.84e-05	5.18e-05	4.26e-05
		7.6e-05	7.62e-05	8.82e-05	0.000101	4.23e-05	7.06e-05
	N	5	5	5	5	5	5
	Mean	7.456e-05	8.502e-05	6.112e-05	7.932e-05	4.862e-05	6.498e-05
	SD	1.46955e-05	1.209e-05	2.06958e-05	1.86472e-05	1.00358e-05	1.48163e-05
	Median	6.71e-05	8.63e-05	5.99e-05	8.77e-05	4.29e-05	7.06e-05
	SEM	6.57203e-06	5.40679e-06	9.25545e-06	8.33927e-06	4.48814e-06	6.62604e-06
	95%CI	5.63131e-05	7.00083e-05	3.54227e-05	5.61665e-05	3.61589e-05	4.65832e-05
		9.28069e-05	0.000100032	8.68173e-05	0.000102474	6.10811e-05	8.33768e-05
		Vegf mRNA
	Category	IgG Control	anti IL-4RαAb	IgG Control	anti IL-4RαAb	IgG Control	anti IL-4RαAb
		IL-4 0ng/ml		IL-4 10ng/ml		IL-4 100ng/ml
	Vegf mRNA (×10-6 copy/GAPDH)	0.5	0.449	0.284	0.45	0.143	0.506
		0.794	0.326	0.439	0.623	0.56	0.329
		0.774	0.3	0.387	0.651	0.506	0.303
		0.805	0.395	0.522	0.67	0.486	0.302
		0.783	0.464	0.394	0.647	0.235	0.267
	N	5	5	5	5	5	5
	Mean	7.312e-07	3.868e-07	4.052e-07	6.082e-07	3.86e-07	3.414e-07
	SD	1.29768e-07	7.26753e-08	8.65026e-08	9.00039e-08	1.84747e-07	9.46166e-08
	Median	7.83e-07	3.95e-07	3.94e-07	6.47e-07	4.86e-07	3.03e-07
	SEM	5.8034e-08	3.25014e-08	3.86851e-08	4.0251e-08	8.26214e-08	4.23138e-08
	95%CI	5.70072e-07	2.96562e-07	2.97793e-07	4.96445e-07	1.56606e-07	2.23918e-07
		8.92328e-07	4.77038e-07	5.12607e-07	7.19955e-07	6.15394e-07	4.58882e-07
		Tek mRNA
	Category	IgG Control	anti IL-4RαAb	IgG Control	anti IL-4RαAb	IgG Control	anti IL-4RαAb
		IL-4 0ng/ml		IL-4 10ng/ml		IL-4 100ng/ml
	Tek mRNA (×10-7 copy/GAPDH)	0	0	0	0	0	0
		0	0	0	0	0	0
		0	0	0	0	0	0
		0	0	0	0	0	1.31
		0	0	0	0	0	0
	N	8	8	8	8	8	8
	Mean	0	0	0	0	0	3.02481e-08
	SD	0	0	0	0	0	4.57423e-08
	Median	0	0	0	0	0	1.31e-08
	SEM	0	0	0	0	0	1.61723e-08
	95%CI	0	0	0	0	0	-7.99337e-09
		0	0	0	0	0	6.84896e-08
		Angpt1 mRNA
	Category	IgG Control	anti IL-4RαAb	IgG Control	anti IL-4RαAb	IgG Control	anti IL-4RαAb
		IL-4 0ng/ml		IL-4 10ng/ml		IL-4 100ng/ml
	Angpt1 mRNA (×10-5 copy/GAPDH)	0	0	0.497	0	0	0.421
		0	0	0	0	0	0
		0.502	0	0	0	0	0
		0	0	0	0	0	0
		0.692	0	0.465	0	0	0.388
	N	5	5	5	5	5	5
	Mean	2.388e-06	0	1.924e-06	0	0	1.618e-06
	SD	3.33819e-06	0	2.63697e-06	0	0	2.21861e-06
	Median	0	0	0	0	0	0
	SEM	1.49288e-06	0	1.17929e-06	0	0	9.92192e-07
	95%CI	-1.75691e-06	0	-1.35024e-06	0	0	-1.13677e-06
		6.53291e-06	0	5.19824e-06	0	0	4.37277e-06
		Selp mRNA
	Category	IgG Control	anti IL-4RαAb	IgG Control	anti IL-4RαAb	IgG Control	anti IL-4RαAb
		IL-4 0ng/ml		IL-4 10ng/ml		IL-4 100ng/ml
	Selp mRNA (×10-6 copy/GAPDH)	0	0	0	0	0	0
		0	0.682	0	0	2.97	0
		0	0	0	0	0	0
		0	0	0	0.992	0	0
		0	0	0	0	0	0
	N	5	5	5	5	5	5
	Mean	0	1.364e-07	0	1.984e-07	5.94e-07	0
	SD	0	3.05e-07	0	4.43636e-07	1.32822e-06	0
	Median	0	0	0	0	0	0
	SEM	0	1.364e-07	0	1.984e-07	5.94e-07	0
	95%CI	0	-2.42307e-07	0	-3.52447e-07	-1.05521e-06	0
		0	5.15107e-07	0	7.49247e-07	2.24321e-06	0
		Ednra mRNA
	Category	IgG Control	anti IL-4RαAb	IgG Control	anti IL-4RαAb	IgG Control	anti IL-4RαAb
		IL-4 0ng/ml		IL-4 10ng/ml		IL-4 100ng/ml
	Ednra mRNA (×10-5 copy/GAPDH)	0.221	0.00279	0	0.194	0.094	0.0847
		0.239	0.0149	0.1	0.0989	0.0614	0.00625
		0.209	0.0811	0.129	0.067	0.0455	0.024
		0.4	0.0761	0.0747	0.172	0.0263	0.084
		0.304	0.0659	0.0711	0.175	0.0315	0.0597
	N	5	5	5	5	5	5
	Mean	2.746e-06	4.8158e-07	7.496e-07	1.4138e-06	5.174e-07	5.173e-07
	SD	7.91094e-07	3.6555e-07	4.79095e-07	5.51672e-07	2.72718e-07	3.54587e-07
	Median	2.39e-06	6.59e-07	7.47e-07	1.72e-06	4.55e-07	5.97e-07
	SEM	3.53788e-07	1.63479e-07	2.14258e-07	2.46715e-07	1.21963e-07	1.58576e-07
	95%CI	1.76373e-06	2.76903e-08	1.54725e-07	7.28809e-07	1.78775e-07	7.70221e-08
		3.72827e-06	9.3547e-07	1.34448e-06	2.09879e-06	8.56025e-07	9.57578e-07
		Cdh5 mRNA
	Category	IgG Control	anti IL-4RαAb	IgG Control	anti IL-4RαAb	IgG Control	anti IL-4RαAb
		IL-4 0ng/ml		IL-4 10ng/ml		IL-4 100ng/ml
	Cdh5 mRNA (copy/GAPDH)	0.0241	0.025	0.0137	0.0221	0.0173	0.0192
		0.023	0.024	0.0214	0.0281	0.0152	0.0203
		0.0271	0.015	0.0183	0.025	0.0144	0.0207
		0.0263	0.0235	0.0193	0.0311	0.0154	0.0192
		0.0228	0.0191	0.0157	0.0292	0.0145	0.0207
	N	5	5	5	5	5	5
	Mean	0.02466	0.02132	0.01768	0.0271	0.01536	0.02002
	SD	0.00194756	0.00419369	0.00302523	0.00356441	0.00116748	0.000766159
	Median	0.0241	0.0235	0.0183	0.0281	0.0152	0.0203
	SEM	0.000870976	0.00187547	0.00135292	0.00159405	0.000522111	0.000342637
	95%CI	0.0222418	0.0161129	0.0139237	0.0226742	0.0139104	0.0190687
		0.0270782	0.0265271	0.0214363	0.0315258	0.0168096	0.0209713
		F2r mRNA
	Category	IgG Control	anti IL-4RαAb	IgG Control	anti IL-4RαAb	IgG Control	anti IL-4RαAb
		IL-4 0ng/ml		IL-4 10ng/ml		IL-4 100ng/ml
	F2r mRNA (×10-3 copy/GAPDH)	0.0659	0.116	0.1	0.129	0.145	0.128
		0.112	0.125	0.155	0.172	0.125	0.172
		0.0945	0.132	0.143	0.117	0.194	0.213
		0.103	0.0938	0.178	0.158	0.12	0.214
		0.117	0.0994	0.175	0.145	0.266	0.123
	N	5	5	5	5	5	5
	Mean	9.848e-05	0.00011324	0.0001502	0.0001442	0.00017	0.00017
	SD	2.01464e-05	1.63349e-05	3.15547e-05	2.19932e-05	6.11187e-05	4.40511e-05
	Median	0.000103	0.000116	0.000155	0.000145	0.000145	0.000172
	SEM	9.00974e-06	7.30518e-06	1.41117e-05	9.83565e-06	2.73331e-05	1.97003e-05
	95%CI	7.3465e-05	9.29576e-05	0.00011102	0.000116892	9.41111e-05	0.000115303
		0.000123495	0.000133522	0.00018938	0.000171508	0.000245889	0.000224697
		F2rl1 mRNA
	Category	IgG Control	anti IL-4RαAb	IgG Control	anti IL-4RαAb	IgG Control	anti IL-4RαAb
		IL-4 0ng/ml		IL-4 10ng/ml		IL-4 100ng/ml
	F2rl1 mRNA (×10-5 copy/GAPDH)	0	0	0	0	0	0
		0	0	0	1.16	0.489	0
		0	0	0	0	0	0
		0.5	0	0	0	0	0
		0	0	0.547	0	0	0
	N	5	5	5	5	5	5
	Mean	1e-06	0	1.094e-06	2.32e-06	9.78e-07	0
	SD	2.23607e-06	0	2.44626e-06	5.18768e-06	2.18687e-06	0
	Median	0	0	0	0	0	0
	SEM	1e-06	0	1.094e-06	2.32e-06	9.78e-07	0
	95%CI	1.39577e-06	0	1.52697e-06	3.23819e-06	1.36506e-06	0
		5.48421e-06	0	5.99973e-06	1.27234e-05	5.36356e-06	0
