# Supplementary material for: Role of IL-4 in bone marrow driven dysregulated angiogenesis and age-related macular degeneration
Source: eLife. 2020 May 5;9:e54257. doi: 10.7554/eLife.54257 (PMC7200155; doi:10.7554/eLife.54257)
Supplement: Figure 3—figure supplement 2—source data 1. [file elife-54257-fig3-figsupp2-data1.xlsx]

## Sheet: Fig3-sup2
	Figure 3-figure supplement 2
	Raw Data							Statistics
	CCL2							CCL2
	IL-4	0 ng/mL	1 ng/mL	10 ng/mL
	CCL2 (ng/mL)	10.5363	14.0063	13.5894				ANOVA table
		9.18849	13.5449	13.396					SS	DF	MS	F-value	P-value		SS: sum of squares
		10.8214	16.3094	13.8466				Factors	48.3095	2	24.1548	24.655	5.62208e-05	***	DF: degrees of freedom
		10.1036	13.1142	13.4386				Error	11.7565	12	0.979709				MS: mean squares
		9.0945	12.312	13.9561				Total	60.066	14
	N	5	5	5											*P<0.05
	Mean	9.94885	13.8574	13.6454						P-value					**P<0.0005
	SD	0.78078	1.50607	0.247538				Category 1	Category 2	Bonferroni	Tukey				***P<0.0001
	Median	10.1036	13.5449	13.5894				0 ng/mL	1 ng/mL	0.000128866	0.000119524	**
	SEM	0.349175	0.673533	0.110703				0 ng/mL	10 ng/mL	0.000215936	0.000198414	**
	95%CI	8.97939	11.9874	13.338
		10.9183	15.7274	13.9527
	VEGFR-1							VEGFR-1
	IL-4	0 ng/mL	1 ng/mL	10 ng/mL
	VEGFR-1 (ng/mL)	1.45721	2.7159	3.33934				ANOVA table
		1.1689	2.24752	2.77999					SS	DF	MS	F-value	P-value
		1.06916	2.18212	2.61439				Factors	6.83714	2	3.41857	40.6466	4.52885e-06	***
		1.07528	1.92647	2.54933				Error	1.00926	12	0.0841047
		0.957287	1.88614	2.60625				Total	7.8464	14
	N	5	5	5
	Mean	1.14557	2.19163	2.77786						P-value
	SD	0.189667	0.332303	0.325446				Category 1	Category 2	Bonferroni	Tukey
	Median	1.07528	2.18212	2.61439				0 ng/mL	1 ng/mL	0.000295907	0.000270606	**
	SEM	0.0848217	0.148611	0.145544				0 ng/mL	10 ng/mL	3.72944e-06	5.195e-06	***
	95%CI	0.910065	1.77902	2.37376				1 ng/mL	10 ng/mL	0.0230616	0.0195023	*
		1.38107	2.60424	3.18195
