# Supplementary material for: Role of IL-4 in bone marrow driven dysregulated angiogenesis and age-related macular degeneration
Source: eLife. 2020 May 5;9:e54257. doi: 10.7554/eLife.54257 (PMC7200155; doi:10.7554/eLife.54257)
Supplement: Figure 3—source data 1. [file elife-54257-fig3-data1.xlsx]

## Sheet: Fig3a
	Figure 3a	Mouse endothelial progenitor cell
	Raw Data										Statistics
	Ccl2 mRNA										Ccl2 mRNA
	Category	IgG Control	anti IL-4RαAb	IgG Control	anti IL-4RαAb	IgG Control	anti IL-4RαAb				ANOVA table
		IL-4 0ng/ml		IL-4 10ng/ml		IL-4 100ng/ml						SS	DF	MS	F-value	P-value		SS: sum of squares
	Ccl2 mRNA (copy/GAPDH)	0.06003	0.06168	0.14376	0.06387	0.13629	0.09255				Factors	0.0350748	5	0.00701497	71.7074	1.23335e-13	*****	DF: degrees of freedom
		0.06567	0.06315	0.1665	0.06309	0.1242	0.08409				Error	0.00234786	24	9.78277e-05				MS: mean squares
		0.05598	0.04953	0.12405	0.05643	0.13167	0.0747				Total	0.0374227	29
		0.05613	0.04644	0.14364	0.06735	0.1011	0.08133											*****P<0.0005
		0.06981	0.05016	0.141	0.06351	0.13362	0.08001							P-value
	N	5	5	5	5	5	5					Category 1	Category 2	Bonferroni	Tukey
	Mean	0.061524	0.054192	0.14379	0.06285	0.125376	0.082536				IL-4 10ng/ml	IgG Control	anti IL-4RαAb	3.8801e-11	1.26108e-06	*****
	SD	0.00608092	0.00765507	0.0151098	0.00396863	0.0142951	0.00655616				IL-4 100ng/ml	IgG Control	anti IL-4RαAb	6.60225e-06	7.29457e-06	*****
	Median	0.06003	0.05016	0.14364	0.06351	0.13167	0.08133
	SEM	0.00271947	0.00342345	0.00675729	0.00177482	0.00639297	0.00293201
	95%CI	0.0539735	0.044687	0.125029	0.0579223	0.107626	0.0743954
		0.0690745	0.063697	0.162551	0.0677777	0.143126	0.0906766
	Flt1 mRNA										Flt1 mRNA
	Category	IgG Control	anti IL-4RαAb	IgG Control	anti IL-4RαAb	IgG Control	anti IL-4RαAb				ANOVA table
		IL-4 0ng/ml		IL-4 10ng/ml		IL-4 100ng/ml						SS	DF	MS	F-value	P-value
	Flt1 mRNA (copy/GAPDH)	0.00579	0.00584	0.0115	0.00633	0.0207	0.0117				Factors	0.00107769	5	0.000215537	55.011	2.30613e-12	*****
		0.00551	0.00651	0.0214	0.00725	0.02	0.0114				Error	9.40339e-05	24	3.91808e-06
		0.0068	0.00542	0.0181	0.00631	0.0214	0.0111				Total	0.00117172	29
		0.00608	0.00611	0.0223	0.00846	0.0206	0.0119
		0.00681	0.00493	0.0159	0.00818	0.024	0.0109							P-value
	N	5	5	5	5	5	5					Category 1	Category 2	Bonferroni	Tukey
	Mean	0.006198	0.005762	0.01784	0.007306	0.02134	0.0114				IL-4 10ng/ml	IgG Control	anti IL-4RαAb	1.91399e-07	1.44004e-06	*****
	SD	0.000589635	0.000611531	0.00437584	0.0010054	0.0015678	0.000412311				IL-4 100ng/ml	IgG Control	anti IL-4RαAb	5.40751e-07	1.76404e-06	*****
	Median	0.00608	0.00584	0.0181	0.00725	0.0207	0.0114
	SEM	0.000263693	0.000273485	0.00195694	0.000449629	0.000701142	0.000184391
	95%CI	0.00546587	0.00500268	0.0124067	0.00605763	0.0193933	0.010888
		0.00693013	0.00652132	0.0232733	0.00855437	0.0232867	0.011912

## Sheet: Fig3b
	Figure 3b	Mouse retinal vascular endothelial cell
	Raw Data							Statistics
	Ccl2 mRNA							Ccl2 mRNA
	Category	IL-4 0ng/ml	IL-4 1 ng/ml	IL-4 10 ng/ml				ANOVA table
	Ccl2 mRNA (copy/GAPDH)	0.0499	0.0817	0.1181					SS	DF	MS	F-value	P-value		SS: sum of squares
		0.0798	0.1011	0.1423				Factors	0.00487729	2	0.00243865	5.84843	0.0168633	*	DF: degrees of freedom
		0.0687	0.1251	0.105				Error	0.00500369	12	0.000416974				MS: mean squares
		0.1022	0.1386	0.1008				Total	0.00988098	14
		0.0697	0.0846	0.1156
	N	5	5	5						P-value					*P<0.05
	Mean	0.07406	0.10622	0.11636				Category 1	Category 2	Bonferroni	Tukey
	SD	0.0190804	0.0249989	0.0161837				IL-4 0ng/ml	IL-4 10 ng/ml	0.0199118	0.0169161	*
	Median	0.0697	0.1011	0.1156
	SEM	0.00853303	0.0111799	0.00723758
	95%CI	0.0503685	0.0751797	0.0962652
		0.0977515	0.13726	0.136455
	Flt1 mRNA							Flt1 mRNA
	Category	IL-4 0ng/ml	IL-4 1 ng/ml	IL-4 10 ng/ml				ANOVA table
	Flt1 mRNA (copy/GAPDH)	0.0249	0.0308	0.0318					SS	DF	MS	F-value	P-value
		0.0218	0.0485	0.0337				Factors	0.000473841	2	0.000236921	6.72516	0.0109882	*
		0.0266	0.0319	0.0357				Error	0.000422748	12	3.5229e-05
		0.0257	0.041	0.0306				Total	0.000896589	14
		0.0199	0.0287	0.044
	N	5	5	5						P-value
	Mean	0.02378	0.03618	0.03516				Category 1	Category 2	Bonferroni	Tukey
	SD	0.00282259	0.00834008	0.00530688				IL-4 0ng/ml	IL-4 1 ng/ml	0.0189081	0.0160884	*
	Median	0.0249	0.0319	0.0337				IL-4 0ng/ml	IL-4 10 ng/ml	0.0313105	0.0262023	*
	SEM	0.0012623	0.0037298	0.00237331
	95%CI	0.0202753	0.0258244	0.0285706
		0.0272847	0.0465356	0.0417494

## Sheet: Fig3c
	Figure 3c
	Raw Data												Statistics
	c	IL4ra-/-											c	IL4ra-/-
	Ccl2 mRNA												Ccl2 mRNA
	EPC	Wild type	Il4ra-/-	Wild type	Il4ra-/-	Wild type	Il4ra-/-	Wild type	Il4ra-/-				ANOVA table
	Cytokine	media		IL-4		IL-13		VEGF						SS	DF	MS	F-value	P-value		SS: sum of squares
	Ccl2 mRNA (copy/GAPDH)	0.0611	0.0133	0.1312	0.0034	0.1018	0.0133	0.0758	0.0152				Factors	0.106948	7	0.0152782	75.964	4.40376e-21	*****	DF: degrees of freedom
		0.0256	0.0153	0.1353	0.00228	0.1221	0.013	0.0242	0.0125				Error	0.00804498	40	0.000201125				MS: mean squares
		0.0185	0.0186	0.1181	0.00364	0.0975	0.00895	0.0206	0.0162				Total	0.114993	47
		0.0315	0.0119	0.1695	0.0022	0.1091	0.0141	0.0628	0.0129											*****P<0.0005
		0.0339	0.0126	0.1768	0.00234	0.0957	0.0151	0.0293	0.0164							P-value				**P<0.01
		0.0204	0.022	0.1123	0.00198	0.1198	0.0143	0.0412	0.0143					Category 1	Category 2	Bonferroni	Tukey
	N	6	6	6	6	6	6	6	6				Wild type	media	IL-4	8.50654e-15	1.27276e-06	*****
	Mean	0.0318333	0.0156167	0.140533	0.00264	0.107667	0.013125	0.0423167	0.0145833				Wild type	media	IL-13	4.7083e-10	1.27323e-06	*****
	SD	0.0155452	0.0039504	0.0267178	0.00069662	0.0113011	0.00217756	0.0224107	0.00164611				Wild type	IL-4	IL-13	0.00713665	0.0056765	**
	Median	0.02855	0.0143	0.13325	0.00231	0.10545	0.0137	0.03525	0.01475				IL-4	Wild type	Il4ra-/-	2.58788e-18	1.27276e-06	*****
	SEM	0.00634632	0.00161274	0.0109075	0.000284394	0.00461365	0.000888984	0.00914915	0.00067202				IL-13	Wild type	Il4ra-/-	7.30112e-13	1.27277e-06	*****
	95%CI	0.0155196	0.011471	0.112495	0.00190894	0.0958069	0.0108398	0.018798	0.0128559
		0.0481471	0.0197624	0.168572	0.00337106	0.119526	0.0154102	0.0658353	0.0163108
	Flt1 mRNA												Flt1 mRNA
	EPC	Wild type	Il4ra-/-	Wild type	Il4ra-/-	Wild type	Il4ra-/-	Wild type	Il4ra-/-				ANOVA table
	Cytokine	media		IL-4		IL-13		VEGF						SS	DF	MS	F-value	P-value
	Flt1 mRNA (copy/GAPDH)	0.0106	0.00151	0.0595	0.0249	0.042	0.00652	0.0153	0.00184				Factors	0.0192726	7	0.00275323	98.2873	3.64468e-23	*****
		0.00888	0.00145	0.0536	0.0151	0.028	0.00294	0.00619	0.00257				Error	0.00112048	40	2.80121e-05
		0.00871	0.00165	0.0595	0.0142	0.028	0.00187	0.00475	0.00456				Total	0.0203931	47
		0.00708	0.00271	0.0603	0.0151	0.0289	0.00287	0.00637	0.0022
		0.00759	0.00178	0.0871	0.0125	0.0379	0.000638	0.00985	0.00209							P-value
		0.00408	0.00306	0.06	0.0198	0.0352	0.00133	0.0061	0.00257					Category 1	Category 2	Bonferroni	Tukey
	N	6	6	6	6	6	6	6	6				Wild type	media	IL-4	1.76214e-19	1.27276e-06	*****
	Mean	0.00782333	0.00202667	0.0633333	0.0169333	0.0333333	0.00269467	0.00809333	0.00263833				Wild type	media	IL-13	7.50964e-09	1.28008e-06	*****
	SD	0.00220146	0.000683657	0.0119104	0.0045942	0.00593285	0.00207347	0.00391831	0.000983085				Wild type	IL-4	IL-13	9.16809e-11	1.27285e-06	*****
	Median	0.00815	0.001715	0.05975	0.0151	0.03205	0.00237	0.00628	0.002385				IL-4	Wild type	Il4ra-/-	9.4139e-17	1.27276e-06	*****
	SEM	0.000898742	0.000279102	0.00486242	0.00187557	0.00242207	0.00084649	0.00159964	0.000401343				IL-13	Wild type	Il4ra-/-	5.00723e-11	1.27281e-06	*****
	95%CI	0.00551304	0.00130921	0.0508341	0.012112	0.0271072	0.000518694	0.00398132	0.00160665
		0.0101336	0.00274412	0.0758326	0.0217546	0.0395595	0.00487064	0.0122053	0.00367002

## Sheet: Fig3d
	Figure 3d
	Raw Data												Statistics
	d	Il13ra1-/-											d	Il13ra1-/-
	Ccl2 mRNA												Ccl2 mRNA
	EPC	Wild type	Il13ra1-/-	Wild type	Il13ra1-/-	Wild type	Il13ra1-/-	Wild type	Il13ra1-/-				ANOVA table
	Cytokine	media		IL-4		IL-13		VEGF						SS	DF	MS	F-value	P-value		SS: sum of squares
	Ccl2 mRNA (copy/GAPDH)	0.00453	0.0068	0.0228	0.0237	0.0108	0.00706	0.00368	0.00858				Factors	0.106948	7	0.0152782	75.964	4.40376e-21	*****	DF: degrees of freedom
		0.00369	0.00711	0.0156	0.0174	0.013	0.00619	0.00535	0.00693				Error	0.00804498	40	0.000201125				MS: mean squares
		0.00579	0.00517	0.015	0.0196	0.0132	0.00625	0.00569	0.00845				Total	0.114993	47
		0.00723	0.00663	0.0125	0.0194	0.0124	0.00687	0.00535	0.00487											****P<0.001
		0.00558	0.00562	0.015	0.0183	0.0108	0.0077	0.00693	0.00662							P-value				*****P<0.0005
		0.00561	0.00684	0.0157	0.0157	0.0177	0.00867	0.00533	0.00937					Category 1	Category 2	Bonferroni	Tukey
	N	6	6	6	6	6	6	6	6				Wild type	media	IL-4	6.10728e-10	1.27336e-06	*****
	Mean	0.005405	0.00636167	0.0161	0.0190167	0.0129833	0.00712333	0.00538833	0.00747				Wild type	media	IL-13	2.61784e-06	3.75358e-06	*****
	SD	0.00120485	0.000777571	0.00348368	0.00270364	0.00253647	0.000940929	0.00103851	0.00164782				Wild type	IL-4	IL-13	0.000304321	0.000271752	****
	Median	0.005595	0.006715	0.0153	0.01885	0.0127	0.006965	0.00535	0.00769				Il13ra1-/-	media	IL-13	4.80622e-12	1.27277e-06	*****
	SEM	0.000491879	0.000317442	0.0014222	0.00110376	0.00103551	0.000384133	0.000423969	0.000672721				IL-13	Wild type	Il13ra1-/-	3.02463e-11	1.27279e-06	*****
	95%CI	0.00414058	0.00554566	0.0124441	0.0161794	0.0103215	0.00613589	0.00429849	0.00574072
		0.00666942	0.00717768	0.0197559	0.021854	0.0156452	0.00811078	0.00647818	0.00919928
	Flt1 mRNA												Flt1 mRNA
	EPC	Wild type	Il13ra1-/-	Wild type	Il13ra1-/-	Wild type	Il13ra1-/-	Wild type	Il13ra1-/-				ANOVA table
	Cytokine	media		IL-4		IL-13		VEGF						SS	DF	MS	F-value	P-value
	Flt1 mRNA (copy/GAPDH)	0.00161	0.00175	0.0429	0.0332	0.0227	0.00166	0.00188	0.00185				Factors	0.0149298	7	0.00213283	272.151	1.1552e-31	*****
		0.0026	0.00131	0.0479	0.0343	0.0226	0.00186	0.00152	0.00165				Error	0.000313477	40	7.83694e-06
		0.00199	0.00159	0.0438	0.0366	0.0256	0.00257	0.00156	0.00217				Total	0.0152433	47
		0.00201	0.00128	0.0481	0.038	0.0236	0.00253	0.00206	0.00137
		0.00232	0.0017	0.0545	0.0453	0.0187	0.00188	0.00331	0.00352							P-value
		0.00217	0.00173	0.0553	0.0314	0.0173	0.00187	0.003	0.00198					Category 1	Category 2	Bonferroni	Tukey
	N	6	6	6	6	6	6	6	6				Wild type	media	IL-4	6.043e-27	1.27276e-06	*****
	Mean	0.00211667	0.00156	0.04875	0.0364667	0.02175	0.00206167	0.00222167	0.00209				Wild type	media	IL-13	1.48992e-13	1.27277e-06	*****
	SD	0.000335241	0.000212791	0.0052122	0.00492815	0.0031297	0.000387165	0.000756741	0.000752728				Wild type	IL-4	IL-13	3.44063e-18	1.27276e-06	*****
	Median	0.00209	0.001645	0.048	0.03545	0.02265	0.001875	0.00197	0.001915				IL-4	Wild type	Il13ra1-/-	7.77918e-08	1.34796e-06	*****
	SEM	0.000136862	8.68716e-05	0.00212787	0.00201191	0.00127769	0.000158059	0.000308938	0.0003073				IL-13	Wild type	Il13ra1-/-	1.36353e-13	1.27276e-06	*****
	95%CI	0.00176485	0.00133669	0.0432801	0.0312949	0.0184656	0.00165536	0.00142752	0.00130006				Il13ra1-/-	media	IL-4	3.25876e-22	1.27276e-06	*****
		0.00246848	0.00178331	0.0542199	0.0416384	0.0250344	0.00246797	0.00301582	0.00287994				Il13ra1-/-	IL-4	IL-13	5.55742e-22	1.27276e-06	*****

## Sheet: Fig3e
	Figure 3e
	Raw Data												Statistics
	e	IL4-/-											e	IL4-/-
	Ccl2 mRNA												Ccl2 mRNA
	EPC	Wild type	Il4-/-	Wild type	Il4-/-	Wild type	Il4-/-	Wild type	Il4-/-				ANOVA table
	Cytokine	media		IL-4		IL-13		VEGF						SS	DF	MS	F-value	P-value		SS: sum of squares
	Ccl2 mRNA (copy/GAPDH)	0.0311	0.0331	0.1565	0.1434	0.1029	0.0781	0.0403	0.0369				Factors	0.111208	7	0.0158868	26.9939	2.95227e-13	*****	DF: degrees of freedom
		0.0357	0.0316	0.0944	0.1623	0.0645	0.0817	0.0254	0.0248				Error	0.0235413	40	0.000588532				MS: mean squares
		0.0214	0.0378	0.0965	0.1632	0.1213	0.1064	0.0472	0.0509				Total	0.134749	47
		0.0429	0.0335	0.1911	0.1482	0.1233	0.0724	0.0382	0.041											***P<0.005
		0.0416	0.0343	0.1241	0.1351	0.123	0.0961	0.0271	0.0439							P-value				****P<0.001
		0.0318	0.0545	0.1823	0.2098	0.1194	0.1713	0.0449	0.0573					Category 1	Category 2	Bonferroni	Tukey			*****P<0.0005
	N	6	6	6	6	6	6	6	6				Wild type	media	IL-4	7.29068e-08	1.34325e-06	*****
	Mean	0.0340833	0.0374667	0.140817	0.160333	0.109067	0.101	0.0371833	0.0424667				Wild type	media	IL-13	0.000106836	9.82084e-05	*****
	SD	0.00789719	0.00859643	0.0421739	0.0265696	0.0231403	0.0366336	0.00906806	0.0113				Il4-/-	media	IL-4	2.05155e-09	1.27477e-06	*****
	Median	0.03375	0.0339	0.1403	0.15525	0.12035	0.0889	0.03925	0.04245				Il4-/-	media	IL-13	0.00143483	0.00122318	***
	SEM	0.00322402	0.00350948	0.0172174	0.010847	0.009447	0.0149556	0.00370202	0.00461322				Il4-/-	IL-4	IL-13	0.00363128	0.00298514	***
	95%CI	0.0257957	0.0284453	0.0965579	0.13245	0.0847824	0.0625553	0.027667	0.030608
		0.0423709	0.0464881	0.185075	0.188216	0.133351	0.139445	0.0466997	0.0543253
	Flt1 mRNA												Flt1 mRNA
	EPC	Wild type	Il4-/-	Wild type	Il4-/-	Wild type	Il4-/-	Wild type	Il4-/-				ANOVA table
	Cytokine	media		IL-4		IL-13		VEGF						SS	DF	MS	F-value	P-value
	Flt1 mRNA (copy/GAPDH)	0.0006	0.0004	0.009	0.0073	0.0043	0.0028	0.0007	0.0005				Factors	0.000532115	7	7.60164e-05	97.0826	4.59364e-23	*****
		0.0005	0.0005	0.0095	0.0063	0.0045	0.0017	0.0004	0.0002				Error	3.13203e-05	40	7.83008e-07
		0.0001	0.0006	0.0081	0.0057	0.0043	0.0036	0.0007	0.0005				Total	0.000563435	47
		0.0007	0.0004	0.0099	0.0087	0.0036	0.0018	0.0004	0.0004
		0.0003	0.0007	0.0097	0.0078	0.0076	0.0041	0.0008	0.0006							P-value
		0.0009	0.0007	0.0118	0.007	0.0064	0.0022	0.0016	0.0004					Category 1	Category 2	Bonferroni	Tukey
	N	6	6	6	6	6	6	6	6				Wild type	media	IL-4	2.96706e-19	1.27276e-06	*****
	Mean	0.000520333	0.000557167	0.00966667	0.00711	0.00511833	0.00268833	0.000771333	0.000412833				Wild type	media	IL-13	1.03018e-09	1.27377e-06	*****
	SD	0.000271291	0.000123201	0.00122942	0.0010716	0.00153505	0.00097598	0.00043543	0.000130323				Wild type	IL-4	IL-13	1.38109e-09	1.27412e-06	*****
	Median	0.000544	0.000561	0.0096	0.007135	0.00442	0.0025	0.000675	0.000432				IL-4	Wild type	Il4-/-	0.000326909	0.000291358	*****
	SEM	0.000110754	5.02967e-05	0.000501907	0.000437478	0.000626681	0.000398442	0.000177764	5.32043e-05				IL-13	Wild type	Il4-/-	0.000717958	0.000625824	****
	95%CI	0.00023563	0.000427875	0.00837647	0.00598543	0.0035074	0.00166411	0.000314377	0.000276067				Il4-/-	media	IL-4	2.61036e-14	1.27276e-06	*****
		0.000805036	0.000686459	0.0109569	0.00823457	0.00672927	0.00371256	0.00122829	0.000549599				Il4-/-	media	IL-13	0.00442561	0.00360554	***
													Il4-/-	IL-4	IL-13	2.93162e-09	1.27563e-06	*****
