# Supplementary material for: Role of IL-4 in bone marrow driven dysregulated angiogenesis and age-related macular degeneration
Source: eLife. 2020 May 5;9:e54257. doi: 10.7554/eLife.54257 (PMC7200155; doi:10.7554/eLife.54257)
Supplement: Figure 4—source data 1. [file elife-54257-fig4-data1.xlsx]

## Sheet: Fig4a
	Figure 4a
	Raw Data									Statistics
	Mouse retinal vascular endothelial cell									Mouse retinal vascular endothelial cell
	MRVEC	media	IL-4	IL-4+anti-IL4 Ab	IL-4+anti-IL4Rα Ab	VEGF				ANOVA table
	Area (pixel) ×104	1.63998	2.41152	1.33488	1.20944	3.11963					SS	DF	MS	F-value	P-value		SS: sum of squares
		0.637536	1.54371	0.14112	0.818656	1.43558				Factors	7.52654	4	1.88163	8.03861	6.60586e-05	*****	DF: degrees of freedom
		1.49093	1.64877	1.26792	1.21315	1.574				Errors	9.83113	42	0.234074				MS: mean squares
		0.901456	1.58326	1.33488	0.859424	3.11963				Total	17.3577	46
		1.05258	2.47352	1.95723	0.369472	1.72088
		0.768144	1.27627	0.898752	0.814384	1.54893						P-value					*P<0.05
		1.03782	1.10149	0.881312	0.97424	1.39733				Category 1	Category 2	Bonferroni	Tukey				**P<0.01
			1.60758	1.01219	1.0621	1.3507				media	VEGF	0.0297493	0.0232816	*			***P<0.005
			1.54565	0.711008	0.719632	1.21915				IL-4	IL-4+anti-IL4 Ab	0.0240166	0.0190611	*			****P<0.001
			1.96968	0.631824	0.6344	1.7884				IL-4	IL-4+anti-IL4Rα Ab	0.00318689	0.00277442	***			*****P<0.0005
	N	7	10	10	10	10				IL-4+anti-IL4 Ab	VEGF	0.00542945	0.00463813	***
	Mean	1.07549	1.71615	1.01711	0.86749	1.82742				IL-4+anti-IL4Rα Ab	VEGF	0.000647774	0.000588596	****
	SD	0.367364	0.445411	0.493363	0.261441	0.701589
	Median	1.03782	1.59542	0.955472	0.83904	1.56146
	SEM	0.138851	0.140851	0.156015	0.082675	0.221862				Fisher's PSD
	95%CI	0.735737	1.39752	0.664181	0.680466	1.32554				Category 1	Category 2	P-value
		1.41525	2.03477	1.37004	1.05451	2.32931				media	IL-4	0.0102857	**
										media	VEGF	0.00297493	***
										IL-4	IL-4+anti-IL4 Ab	0.00240166	***
										IL-4	IL-4+anti-IL4Rα Ab	0.000318689	*****
										IL-4+anti-IL4 Ab	VEGF	0.000542945	****
										IL-4+anti-IL4Rα Ab	VEGF	6.47774e-05	*****
	Human retinal vascular endothelial cell									Human retinal vascular endothelial cell
	HRVEC	media	IL-4	IL-4+anti-IL4 Ab	IL-4+anti-IL4Rα Ab	VEGF				ANOVA table
	Area (pixel) ×104	2.04153	3.51277	2.36758	2.56531	2.49627					SS	DF	MS	F-value	P-value
		2.40436	2.92479	0.961414	0.835702	1.33164				Factors	4.85064	4	1.21266	2.07233	0.105467
		1.40315	1.95521	0.735986	0.440215	1.81281				Error	20.4809	35	0.585167
		0.584054	1.79104	0.864387	1.08203	1.32972				Total	25.3315	39
		0.500507	0.882522	0.85524	0.542372	1.3489
		1.66559	3.16372	1.95813						Fisher's PLSD								Linear mixed-effects regression analysis
		0.764264	1.00584	0.825452						Category 1	Category 2	P-value						Category 1	Category 2	DF	Contrast	SE	95%CI		chi2	P>chi2
		1.23041	1.78908	0.841836						media	IL-4	0.0355677	*					media	IL-4	1	-0.74793	0.320009	-1.37514	-0.120724	5.46	0.0194	*
		0.375675	0.945113	0.75696						IL-4	IL-4+anti-IL-4 Ab	0.0243485	*					IL-4	IL-4+anti-IL4 Ab	1	-0.80509	0.320009	-1.4323	-0.177884	6.33	0.0119	*
		0.503038	0.981948	0.734002														IL-4	IL-4+anti-IL4Rα Ab	1	-0.80207	0.391929	-1.57024	-0.0339029	4.19	0.0407	*
	N	10	10	10	5	5
	Mean	1.14726	1.8952	1.0901	1.09313	1.66387
	SD	0.715978	0.99245	0.577635	0.860719	0.508999
	Median	0.997336	1.79006	0.848538	0.835702	1.3489
	SEM	0.226412	0.31384	0.182664	0.384925	0.227631
	95%CI	0.635078	1.18525	0.676884	0.0244025	1.03186
		1.65944	2.60516	1.50331	2.16185	2.29588

## Sheet: Fig4b
	Figure 4b
	Raw Data												Statistics
	Category	media		IL-4		IL-4+ZM306416		IL-4+ZM323811					ANOVA table
	BMEC	Wild type	Il4ra-/-	Wild type	Il4ra-/-	Wild type	Il4ra-/-	Wild type	Il4ra-/-					SS	DF	MS	F-value	P-value		SS: sum of squares
	Area (pixel) ×104	1.457	0.8852	3.0724	0.8932	2.6714	1.4258	6.4674	2.5424				Factors	222.147	7	31.7353	12.1929	6.1386e-13	*****	DF: degrees of freedom
		1.6786	0.7126	6.4026	1.635	1.2684	3.0906	4.7994	2.7326				Error	517.953	199	2.60278				MS: mean squares
		1.1288	0.5362	6.5226	1.0456	2.6758	1.2726	7.7428	1.6378				Total	740.1	206
		2.2	0.5924	4.5918	1.6142	4.0736	1.0834	5.3022	0.9662											*****P<0.0005
		0.6166	0.5368	6.6896	1.1226	1.3302	1.8636	4.542	1.5708							P-value
		1.4984	0.286	4.7178	1.5508	5.2674	1.2438	0.2698	2.6316					Category 1	Category 2	Bonferroni	Tukey
		0.847	0.2848	5.597	1.217	1.1526	0.855	1.7736	2.4676				IL-4	Wild type	Il4ra-/-	1.11433e-06	2.33245e-06	*****
		1.0428	0.737	0.593	2.3782	5.3976	1.2144	2.9272	1.2354
		1.473	0.8676	2.5296	1.6412	0.8202	1.114	2.0736	1.9536
		1.1968	1.4086	4.3488	1.3518	3.6996	1.3782	3.4144	1.35
		0.6142	0.6942	2.6164	1.6424	4.809	4.4546	3.4258	1.9884
		0.8842	0.5452	1.608	0.8616	2.2478	1.1316	1.4788	1.3538
		0.834	0.4876	5.9546	1.6406	1.2134	0.0002	1.372	1.0514
			2.0738	3.7418	0.794	2.3418	0.9342	3.8474
			0.377	5.35	0.8138	2.462	1.9098	1.4968
			1.1664	3.524	2.4596	2.9854	3.569	1.93
				3.511	1.2862	0.7452	1.8488	4.023
				2.7686	1.0722	3.4568	2.2494	1.0882
				2.6144	4.1768	0.8898	0.837	1.529
				1.9592	0.4984	1.8498	0.484	3.3908
				1.4964	1.3574	3.5232	1.8118	1.8114
				1.9386	0.9092	1.9412	1.1974	12.6692
				2.0102	0.9268	7.6872	1.3724	3.829
				3.0328	1.081	1.024	2.7404	3.7392
				5.0592	1.3728	2.1258	1.574	1.6142
				2.8128	1.5636	2.4986	0.8418	1.0416
				7.9998		1.398	1.8424	2.7628
				1.8138		4.344	2.0352	1.5878
				2.5258		2.8052	1.7858	4.5036
				6.6172		4.621	1.3328	4.9044
				6.6448		1.87	2.2164	5.2396
				3.1304			1.7682
				4.8522
				1.6178
				8.4182
				1.3528
				5.841
				3.0012
				3.4018
				8.0546
				0.0168
				2.222
				0.0078
				1.7298
				1.7578
	N	13	16	45	26	31	32	31	13
	Mean	1.19011	0.761963	3.69042	1.41946	2.74826	1.63996	3.43861	1.80628
	SD	0.459076	0.461283	2.1815	0.723994	1.63455	0.885597	2.45356	0.623936
	Median	1.1288	0.6433	3.0724	1.319	2.462	1.402	3.3908	1.6378
	SEM	0.127325	0.115321	0.325198	0.141987	0.293575	0.156553	0.440672	0.173049
	95%CI	0.912691	0.516162	3.03502	1.12703	2.1487	1.32066	2.53864	1.42924
		1.46752	1.00776	4.34581	1.71189	3.34782	1.95925	4.33858	2.18332

## Sheet: Fig4c
	Figure 4c
	Raw Data																				Statistics
	Category	media				IL-4				IL-13				VEGF							ANOVA table
	BMEC	Wild type	Il4-/-	Il4ra-/-	Il13ra1-/-	Wild type	Il4-/-	Il4ra-/-	Il13ra1-/-	Wild type	Il4-/-	Il4ra-/-	Il13ra1-/-	Wild type	Il4-/-	Il4ra-/-	Il13ra1-/-					SS	DF	MS	F-value	P-value		SS: sum of squares
	Area (pixel) ×104	3.8432	1.9808	2.77728	3.10454	9.7424	1.9044	2.92093	9.9803	3.6904	1.9852	6.14042	0.984	3.00384	3.0432	2.09612	2.52113				Factors	547.573	15	36.5048	13.79	6.0988e-31	*****	DF: degrees of freedom
		0.6916	0.4792	0.604564	0.543704	1.97	0.444	0.447354	1.56376	0.7172	0.456	1.23418	0.14912	0.629338	0.5616	0.406635	0.661088				Error	1858.33	702	2.6472				MS: mean squares
		0.7412	0.4196	0.513494	0.644736	1.0936	0.284	0.709612	3.0404	0.5168	0.3808	1.23552	0.1656	0.717418	0.7168	0.412432	0.588088				Total	2405.9	717
		0.7148	0.3636	0.546069	0.658168	2.1976	0.3712	0.506152	2.01256	0.7668	0.5268	1.5164	0.29072	0.524828	0.6276	0.365778	0.44092											*P<0.05
		0.8696	0.3452	0.453248	0.521512	2.9436	0.5144	0.666762	1.8282	0.9408	0.3532	1.08276	0.18272	0.667673	0.5316	0.538039	0.505744					Category 1	Category 2	P-value				**P<0.01
		0.826	0.3732	0.659206	0.73584	1.5372	0.2908	0.591048	1.5345	0.7488	0.2684	1.07156	0.19584	0.464587	0.6056	0.372956	0.325288							Bonferroni	Tukey			***P<0.005
		3.6468	2.1516	2.87991	4.43314	7.4228	1.7508	2.71956	11.1863	6.5256	2.218	8.30236	0.68864	2.40737	2.4096	2.12372	3.48239				Wild type	media	IL-4	1.36053e-05	1.39093e-05	*****		****P<0.001
		0.8064	0.4612	0.478818	0.87308	1.3332	0.1784	0.598458	1.73184	1.3044	0.4676	2.11221	0.14688	0.313528	0.4188	0.447216	0.610864				Wild type	media	IL-13	0.0154414	0.0111671	*		*****P<0.0005
		0.978	0.514	0.562882	1.12595	1.5152	0.2528	0.357625	4.30892	1.0712	0.3372	1.85731	0.10352	0.536694	0.5084	0.430652	0.857312				Il13ra1-/-	media	IL-4	1.71358e-10	1.30147e-06	*****
		0.7856	0.48	0.629083	0.991048	1.2912	0.43	0.48666	2.08824	1.3664	0.4856	1.79146	0.15984	0.364642	0.5104	0.354184	0.857312				Il13ra1-/-	IL-4	IL-13	2.23063e-19	1.3013e-06	*****
		0.58	0.3904	0.636789	0.798912	1.7552	0.4412	0.747308	1.47378	1.1948	0.4912	1.47967	0.14016	0.511594	0.516	0.421266	0.551296				IL-4	Wild type	Il4-/-	5.43799e-06	6.3969e-06	*****
		0.4968	0.306	0.572339	0.644152	1.5276	0.4484	0.52935	1.58224	1.5888	2.7404	1.06171	0.13824	0.680908	0.4556	0.469853	0.605608				IL-4	Wild type	Il4ra-/-	0.00030919	0.00027112	*****
		4.1204	2.468	3.67292	4.03018	6.0184	2.914	3.01017	14.6175	5.2716	0.4312	7.39879	0.79696	3.33152	2.7148	1.92744	3.26631				IL-4	Wild type	Il13ra1-/-	0.00177065	0.00145671	***
		0.7772	0.3992	0.644144	0.889432	1.4876	0.5892	0.705424	1.66276	1.1028	0.6164	1.47967	0.14752	0.504292	0.3856	0.400286	0.529104				IL-4	Il4-/-	Il13ra1-/-	9.78561e-15	1.3013e-06	*****
		0.7676	0.5732	0.730311	0.779056	1.1308	0.5032	0.656452	3.18824	1.0184	0.3916	1.34124	0.17376	0.623861	0.662	0.424579	0.556552				IL-4	Il4ra-/-	Il13ra1-/-	1.68502e-12	1.3013e-06	*****
		0.8828	0.4152	0.827335	0.70372	1.0724	0.6576	0.542881	4.35534	0.7332	0.6636	1.60824	0.15712	0.766706	0.5708	0.418782	0.708392				IL-13	Wild type	Il4-/-	0.0029984	0.0024068	***
		0.8536	0.5172	0.89844	0.938488	1.0728	0.5	0.581383	4.13204	1.5724	0.6376	1.37215	0.16672	0.672693	0.644	0.382894	0.894104				IL-13	Wild type	Il13ra1-/-	1.22722e-06	2.46774e-06	*****
		0.8392	0.5632	0.572339	0.719488	1.2548	0.664	0.524034	1.27908	0.8448	2.7988	1.59749	0.15168	0.763968	0.4524	0.300904	0.57816				IL-13	Il4-/-	Il4ra-/-	0.0577313	0.0366064	*
		2.9452	1.986	3.66486	4.53943	6.4236	2.3952	4.01426	12.4443	6.5916	0.6568	4.45827	1.2376	3.85407	2.6896	2.6902	4.44658				IL-13	Il4ra-/-	Il13ra1-/-	0.000189035	0.000168357	****
		0.4512	0.3172	0.739768	0.72416	1.0968	0.4352	0.687704	3.47072	1.3088	0.5856	0.937168	0.23664	0.602412	0.6212	0.658953	0.83804
		0.478	0.52	0.519449	0.822856	1.0244	0.3972	0.925315	1.92566	1.1476	0.4764	0.959567	0.18976	0.837444	0.4448	0.553498	0.81176
		0.5744	0.3084	0.749575	1.21063	1.5672	0.5228	0.869577	2.3584	1.1372	0.5716	0.750361	0.23376	0.711941	0.618	0.494974	1.08858
		0.7248	0.4072	0.900191	1.04828	1.1348	0.5764	0.919999	2.57466	1.5272	0.5084	0.744538	0.29664	0.745256	0.508	0.547701	0.77964
		0.7168	0.4324	0.75553	0.733504	1.6004	0.4636	0.611668	2.11486	1.4708	2.2368	1.06663	0.2808	0.957013	0.4976	0.435069	0.927976
		2.8932	2.9588	3.57695	3.67336	9.5868	2.6424	2.13077	12.9364	10.8256	0.3984	4.36688	0.7944	3.23614	3.2272	2.28881	2.89197
		0.5312	0.578	0.748174	0.840376	2.5128	0.5364	0.329917	4.85914	2.2108	0.5352	0.683165	0.1536	0.53852	0.7704	0.489453	0.702552
		0.6816	0.6352	0.871819	1.08858	2.1576	0.4164	0.520973	3.553	1.9256	0.4952	0.832789	0.16784	0.630251	0.6432	0.468748	0.536112
		0.5116	0.6944	0.634337	0.629552	1.9464	0.6848	0.250338	2.02246	2.3824	0.3608	0.893714	0.14944	0.583701	0.6424	0.394764	0.46428
		0.5812	0.4812	0.686177	0.655248	1.2296	0.4228	0.629871	2.50096	2.0564	0.4472	0.914769	0.1952	0.782223	0.5296	0.426787	0.606192
		0.5876	0.5692	0.636439	0.459608	1.74	0.582	0.399509	10.5604	2.2504	2.3084	1.04244	0.12832	0.701445	0.6412	0.508501	0.582832
		3.6304	3.016	4.19167	3.85265	7.7664	2.7808	4.30632	2.61338	6.7636	0.536	8.18902	0.92448	3.98276	3.586	2.77108	2.78626
		0.766	0.594	0.836092	0.979368	1.7696	0.4612	0.87441	2.52868	1.1972	0.51	1.6172	0.18112	0.923242	0.7648	0.499667	0.454352
		0.6616	0.514	0.837493	0.96652	1.5036	0.634	0.761645	1.3915	0.9956	0.4212	1.33497	0.14032	0.663109	0.7468	0.593251	0.440336
		0.5136	0.7856	0.802116	0.562976	1.6396	0.6032	0.764545	2.0042	1.9788	0.4216	1.79997	0.12256	0.921873	0.666	0.547701	0.532024
		0.8276	0.5316	0.891785	0.54604	1.462	0.6892	0.919516	2.02268	1.3804	0.4196	1.63198	0.18448	0.59511	0.6828	0.624446	0.61612
		0.8604	0.5908	0.824183	0.797744	1.3916	0.3932	0.986208		1.2116		1.8049	0.296	0.878974	0.7256	0.506016	0.743432
		3.79542				8.9925				7.58368				3.9272
		0.591592				2.61272				1.00544				0.70495
		0.739928				2.38942				1.1568				0.865529
		1.24392				1.75384				1.25264				0.786239
		0.60444				0.97438				2.43632				0.658975
		0.615536				1.2617				1.73248				0.911504
		3.33055				8.3237				8.57088				4.30232
		0.722408				3.1735				1.41488				0.905507
		0.695544				1.57278				1.89616				0.839543
		0.602688				1.22078				2.1224				0.794234
		0.41172				1.11804				1.88928				0.7969
		0.898192				1.23728				1.24816				0.966141
		2.97373				7.70836				6.04432				4.33564
		0.50224				2.02928				0.8912				0.878855
		0.672184				2.00772				1.52192				1.05076
		0.467784				0.97438				1.08752				0.808893
		0.630136				1.61744				1.55296				0.914169
		0.701384				1.07954				0.99072				0.682295
		4.53943				7.85862				5.86064				3.2982
		0.963016				1.68498				0.97216				0.63632
		0.904616				1.56134				0.81456				0.597675
		0.964768				2.25104				1.24144				0.493731
		0.977616				1.188				1.31088				0.707615
		0.729416				1.1726				1.52144				0.862197
		4.48395				6.93352				7.13472				3.4881
		0.492896				1.9877				1.304				0.610334
		1.33094				1.5136				1.39152				0.595009
		0.988128				1.01464				2.512				0.743595
		0.763872				1.02652				1.38224				1.06009
		0.90812				1.39106				0.54464				0.479073
		2.36637				8.1125				5.29408				4.14508
		0.45844				1.52108				0.84832				0.896845
		0.667512				1.57872				1.03936				0.982798
		0.480048				1.75296				1.29168				1.02078
		0.395368				1.98396				1.13728				0.500394
		0.365				1.27424				0.97744				0.744262
	N	72	36	36	36	72	36	36	35	72	35	36	36	72	36	36	36
	Mean	1.18245	0.808911	1.15349	1.31295	2.63575	0.799311	1.06121	4.0985	2.22657	0.803966	2.15865	0.301444	1.20309	0.981667	0.772038	1.07746
	SD	1.11163	0.762281	1.07278	1.22019	2.45775	0.75637	1.02608	3.79295	2.17087	0.743628	2.09926	0.287105	1.11858	0.91007	0.716227	1.02358
	Median	0.740564	0.5156	0.743971	0.810884	1.57575	0.5088	0.677233	2.50096	1.33864	0.4952	1.42591	0.17744	0.765337	0.6344	0.479653	0.638604
	SEM	0.131007	0.127047	0.178797	0.203366	0.289649	0.126062	0.171013	0.641126	0.25584	0.125696	0.349877	0.0478508	0.131825	0.151678	0.119371	0.170596
	95%CI	0.921225	0.550992	0.790517	0.900091	2.05821	0.543392	0.71404	2.79558	1.71644	0.54852	1.44836	0.204302	0.94024	0.673743	0.529701	0.731135
		1.44367	1.06683	1.51647	1.7258	3.21329	1.05523	1.40839	5.40142	2.7367	1.05941	2.86894	0.398587	1.46595	1.28959	1.01437	1.42379
