# Supplementary material for: Role of IL-4 in bone marrow driven dysregulated angiogenesis and age-related macular degeneration
Source: eLife. 2020 May 5;9:e54257. doi: 10.7554/eLife.54257 (PMC7200155; doi:10.7554/eLife.54257)
Supplement: Figure 5—source data 1. [file elife-54257-fig5-data1.xlsx]

## Sheet: Fig5
	Figure 5a
	Raw Data																		Statistics
	ID	Category		CNV Area (μm2)				Bone marrow	WT			Il4-/-		Il4ra-/-					ANOVA table
		Bone marrow	Host	#1	#2	#3		Host	WT	Il4-/-	Il4ra-/-	WT	Il4-/-	WT	Il4ra-/-						SS	DF	MS	F-value	P-value		SS: sum of squares
	1	WT	WT	1827.12	1680.4	1438.97		N (spot)	36	18	24	12	12	24	24				Within-Subjects	Within-Subjects Factors	3.91863e+06	2	1.95931e+06	111.642	1.25343e-24	***	DF: degrees of freedom
	2			1961.13	1736.57	1272.34		N (eye)	12	6	8	4	4	8	8					Category * Within-Subjects Factors	425990	12	35499.2	2.02274	0.0314925	*	MS: mean squares
	3			1793.74	1190.03	905.211		Mean	1499.77	1460.37	1290.31	999.574	584.121	1197.71	919.901					Error	1.5093e+06	86	17550
	4			1778.64	1577.79	1205.3		SD	339.002	273.126	362.081	263.037	150.7	202.422	159.198				Between-Subjects	Category	1.15601e+07	6	1.92669e+06	20.4246	3.86584e-11	***	*P<0.05
	5			1801.56	1699.53	1494.93		Range	1237.41	1018.24	1460.26	828.607	567.687	887.606	559.319					Error	4.05626e+06	43	94331.6				**P<0.005
	6			1563.68	991.894	934.606		Minimum	900.234	848.246	608.555	575.607	260.503	735.951	731.332				Total		2.24021e+07	149					***P<0.0005
	7			2137.65	2019.8	1239.13		Q1	1258.32	1358.3	1040.38	845.641	529.702	1080.6	805.177
	8			1301.12	1264.71	900.234		Median	1479.3	1492.01	1264.78	948.549	613.953	1238.65	898.488
	9			2006.66	1833.38	1395.65		Q3	1782.42	1628.55	1470.41	1185.84	663.761	1319.53	989.821
	10			1543.58	1446.45	1298.83		Maximum	2137.65	1866.48	2068.81	1404.21	828.19	1623.56	1290.65
	11			1908.31	1463.67	1439.29		IQR	524.101	270.246	430.027	340.201	134.059	238.93	184.644				Category 1		Category 2		P-value
	12			1712.76	1108.31	1118.76		SEM	56.5003	64.3764	73.9095	75.9321	43.5034	41.3192	32.4963				Bone marrow	Host	Bone marrow	Host	Bonferroni	Tukey
	13		Il4-/-	1569.68	1096.49	848.246		CV	0.226036	0.187026	0.280616	0.263149	0.257995	0.169008	0.17306				WT	WT	Il4-/-	WT	0.000308751	0.000260196	***
	14			1766.1	1422.37	1343.26		95%CI	1385.07	1324.54	1137.42	832.449	488.371	1112.23	852.677				WT	WT	Il4-/-	Il4-/-	4.79213e-10	1.27346e-06	***
	15			1512.13	1488.54	1025.93			1614.47	1596.19	1443.2	1166.7	679.871	1283.18	987.124				WT	WT	Il4ra-/-	WT	0.0116047	0.00845785	*
	16			1711.54	1403.43	1297.04													WT	WT	Il4ra-/-	Il4ra-/-	1.56297e-07	1.41744e-06	***
	17			1840.3	1648.17	1542.87		Q1: first quartile											WT	Il4-/-	Il4-/-	WT	0.00475522	0.00363514	**
	18			1866.48	1495.48	1408.54		Q3: third quartile											WT	Il4-/-	Il4-/-	Il4-/-	3.08011e-08	1.30174e-06	***
	19		Il4ra-/-	1724.88	1396.74	1098.95		IQR: interquartile range											WT	Il4ra-/-	Il4ra-/-	Il4ra-/-	0.0029676	0.00231679	**
	20			1357.12	1007.43	933.732		CV: Coefficient of variation											Il4-/-	WT	Il4-/-	Il4-/-	0.0394056	0.0262679	*
	21			1368.26	1237.8	1087.54		CI: Confidence interval											Il4ra-/-	WT	Il4ra-/-	Il4ra-/-	0.0652875	0.0414686	*
	22			1600.27	1049.09	608.555
	23			1291.76	927.516	801.161
	24			1843.42	1816.78	1693.37
	25			2068.81	1065.48	1394.89
	26			1427.12	1152.45	1014.26
	27	Il4-/-	WT	1337.94	697.313	575.607
	28			1314.74	991.292	862.09
	29			1404.21	1093.51	905.805
	30			1142.88	856.533	812.968
	31		Il4-/-	828.19	698.564	659.933
	32			641.045	586.027	411.803
	33			672.722	660.774	260.503
	34			586.86	557.887	445.147
	35	Il4ra-/-	WT	1239.26	1184.76	935.181
	36			1463.43	1346.42	945.343
	37			1238.8	1091.92	1016.54
	38			1343.34	1283.6	1204.77
	39			1311.59	1154.43	839.107
	40			1403.54	1243.67	1046.65
	41			1623.56	1249.27	1238.49
	42			1370.44	1234.95	735.951
	43		Il4ra-/-	979.215	970.285	886.066
	44			1228.08	900.323	732.811
	45			903.033	896.653	834.381
	46			1021.64	859.285	732.812
	47			1115.23	736.555	731.332
	48			1290.65	1032.33	757.352
	49			1170.9	935.337	750.577
	50			923.342	868.307	821.118
